# Supplementary material
Source: publisher site journal article supplement (https://www.dovepress.com/article/346456)
Supplement: Supplementary file 1 [file get_supplementary_file.php]

**Supplementary Table S1: %WA characteristics**

|  | Never smoking | Former smoking | Current smoking | F/X2 | P-value |
| --- | --- | --- | --- | --- | --- |
| %WARUL4 | 0.6287±0.076 | 0.6163±0.0696 | 0.602 (0.5758~0.6345) | 4.331 | 0.115 |
| %WARUL5 | 0.7332±0.0539 | 0.7172±0.0602 | 0.731 (0.693~0.7572) | 1.555 | 0.46 |
| %WARUL6 | 0.7897 (0.7568~0.8224) | 0.7857±0.0509 | 0.7862 (0.7528~0.8216) | 0.212 | 0.899 |
| %WARUL7 | 0.8085±0.0629 | 0.8051±0.0583 | 0.8021±0.0526 | 0.173 | 0.841 |
| %WARML4 | 0.5612±0.0869 | 0.5575 (0.4916~0.5998) | 0.5435 (0.5099~0.5822) | 1.299 | 0.522 |
| %WARML5 | 0.6733±0.0962 | 0.6695±0.0689 | 0.6759±0.0672 | 0.154 | 0.858 |
| %WARML6 | 0.7301±0.0829 | 0.7342 (0.6997~0.7696) | 0.7392±0.0599 | 0.073 | 0.964 |
| %WARML7 | 0.7244±0.0756 | 0.7537 (0.7126~0.7813) | 0.7648±0.0722 | 6.206 | 0.045 |
| %WARLL4 | 0.4552 (0.4184~0.5035) | 0.4467 (0.4128~0.4839) | 0.4396 (0.4116~0.4707) | 5.264 | 0.072 |
| %WARLL5 | 0.5615±0.0709 | 0.566±0.0718 | 0.5608±0.0609 | 0.157 | 0.855 |
| %WARLL6 | 0.6338±0.0887 | 0.6287 (0.5788~0.6781) | 0.6495 (0.6119~0.687) | 3.474 | 0.176 |
| %WARLL7 | 0.6381±0.0812 | 0.6536±0.0722 | 0.6696 (0.6209~0.7146) | 3.702 | 0.157 |
| %WARLL8 | 0.6575±0.0732 | 0.6644±0.0712 | 0.6686±0.0608 | 0.437 | 0.647 |
| %WARLL9 | 0.6759±0.0868 | 0.6867 (0.6524~0.7283) | 0.6985±0.0674 | 3.162 | 0.206 |
| %WALUL4 | 0.5903±0.0742 | 0.575±0.0628 | 0.5792±0.0643 | 0.992 | 0.372 |
| %WALUL5 | 0.6869±0.0654 | 0.6629±0.0687 | 0.6726 (0.6453~0.6988) | 5.137 | 0.077 |
| %WALUL6 | 0.7349±0.0585 | 0.7393±0.0582 | 0.7478±0.0524 | 1.123 | 0.327 |
| %WALUL7 | 0.785±0.0503 | 0.7796±0.0537 | 0.7878±0.0549 | 0.446 | 0.641 |
| %WALLL4 | 0.546±0.0822 | 0.5486±0.0636 | 0.547±0.0717 | 0.024 | 0.976 |
| %WALLL5 | 0.6198±0.0724 | 0.6062 (0.5857~0.6499) | 0.6204 (0.5895~0.6554) | 1.703 | 0.427 |
| %WALLL6 | 0.6517±0.0742 | 0.6669 (0.6223~0.7) | 0.6576±0.0601 | 1.033 | 0.596 |
| %WALLL7 | 0.6974±0.0659 | 0.685±0.0619 | 0.6907±0.0642 | 0.469 | 0.626 |
| %WALLL8 | 0.714±0.077 | 0.7098±0.0603 | 0.7125±0.0601 | 0.046 | 0.955 |
| %WALLL9 | 0.7051±0.0858 | 0.7252±0.0651 | 0.7148±0.0726 | 0.496 | 0.61 |
